# Supplementary material for: Simplified adenine base editors improve adenine base editing efficiency in rice
Source: PubMed Central journal article supplement — Plant Biotechnol J. 2019 Sep 19;18(3):770–8. doi: 10.1111/pbi.13244 (PMC7004905; doi:10.1111/pbi.13244), 2019-09-19
Supplement: PBI-18-770-s001.pdf [file PBI-18-770-s001.pdf]

# Supplemental Information

## Improving adenine base editing efficiency in rice by simplifying base editors

### Contents

**Supplemental sequence** The DNA sequences of key components in the different adenine base editors

**Supplemental Figure 1** Off-target editing at *OsSPL17* by ABE-P1S.

**Supplemental Table 1** The base editing windows of ABE-P1 and ABE-P1S at different target sites.

**Supplemental Table 2** The base editing windows of ABE-P2, ABE-P2S, ABE-P5 and ABE-P5S at different target sites.

**Supplemental Table 3** The base editing frequencies of ABE-P1 and ABE-P1S at potential off-target sites of sgRNA1.

**Supplemental Table 4** The base editing frequencies of ABE-P1 and ABE-P1S at potential off-target sites of sgRNA6.

**Supplemental Table 5** The base editing frequencies of ABE-P2S at potential off-target sites of sgRNA9.

**Supplemental Table 6** The target sites and primers for all sgRNAs used in this study.

**Supplemental Table 7** Primers for on-target site amplification and sequencing.

**Supplemental Table 8** Primers for potential off-target site amplification and sequencing.

1  
2  
3  
4  
5  
6  
7  
8  
9  
10  
11  
12  
13  
14  
15  
16  
17  
18  
19  
20  
21  
22  
23  
24  
25  
26  
27

28 **Supplemental sequence** The DNA sequences of key components in the different  
29 adenine base editors.

30 **Wild type *ecTadA*-32aa linker**

31 ATGTCCGAAGTCGAGTTTTCCCATGAGTACTGGATGAGACACGCATTGACT  
32 CTCGCAAAGAGGGCTTGGGATGAACGCGAGGTGCCCGTGGGGGCAGTACT  
33 CGTGCAACAATCGCGTAATCGGCCAAGGTTGGAATAGGCCGATCGGACG  
34 CCACGACCCCACTGCACATGCGGAAATCATGGCCCTTCGACAGGGAGGGC  
35 TTGTGATGCAGAATTATCGACTTATCGATGCGACGCTGTACGTCACGCTTGA  
36 ACCTTGCGTAATGTGCGCGGGAGCTATGATTCACTCCCGCATTGGACGAGT  
37 TGTATTCGGTGCCCGCAGCCAAGACGGGTGCCGCAGGTTCACTGATGG  
38 ACGTGCTGCATCACCCAGGCATGAACCACCGGGTAGAAATCACAGAAGGC  
39 ATATTGGCGGACGAATGTGCGGCGCTGTTGTCCGACTTTTTTCGCATGCGG  
40 AGGCAGGAGATCAAGGCCAGAAAAAAGCACAATCCTCTACTGACTCTGG  
41 AGGGTCCTCCGGCGGATCGTCCGGCAGCGAGACGCCAGGCACCTCCGAGA  
42 GCGCTACGCCTGAATCCTCTGGAGGGTCCTCCGGCGGATCG

43 ***ecTadA*\*7.10-32aa linker**

44 ATGTCCGAAGTCGAGTTTTCCCATGAGTACTGGATGAGACACGCATTGACT  
45 CTCGCAAAGAGGGCTCGGGATGAACGCGAGGTGCCCGTGGGGGCAGTACT  
46 CGTGCTTAACAATCGCGTAATCGGCCAAGGTTGGAATAGGGCGATCGGACT  
47 CCACGACCCCACTGCACATGCGGAAATCATGGCCCTTCGACAGGGAGGGC  
48 TTGTGATGCAGAATTATCGACTTATCGATGCGACGCTGTACGTCACGTTTGA  
49 ACCTTGCGTAATGTGCGCGGGAGCTATGATTCACTCCCGCATTGGACGAGT  
50 TGTATTCGGTGTCGCAACGCCAAGACGGGTGCCGCAGGTTCACTGATGGA  
51 CGTGCTGCATTACCCAGGCATGAACCACCGGGTAGAAATCACAGAAGGCAT  
52 ATTGGCGGACGAATGTGCGGCGCTGTTGTGCTACTTTTTTCGCATGCCGAG  
53 GCAAGTGTTCAATGCCAGAAAAAAGCACAATCCTCTACTGACTCTGGAG  
54 GGTCCCTCCGGCGGATCGTCCGGCAGCGAGACGCCAGGCACCTCCGAGAGC  
55 GCTACGCCTGAATCCTCTGGAGGGTCCTCCGGCGGATCG

56 **nSpCas9 (D10A)-NLS**

57 GACAAGAAGTACAGCATCGGCCTGGCCATCGGCACCAACTCTGTGGGCTGGGCC  
58 GTGATCACCGACGAGTACAAGGTGCCAGCAAGAAATTCAAGGTGCTGGGCAAC  
59 ACCGACCGGCACAGCATCAAGAAGAACCCTGATCGGAGCCCTGCTGTTTCGACAGC  
60 GCGGAAACAGCCGAGGCCACCCGGCTGAAGAGAACCGCCAGAAGAAGATACAC  
61 CAGACGGAAGAACC GGATCTGCTATCTGCAAGAGATCTTCAGCAACGAGATGGC  
62 CAAGGTGGACGACAGCTTCTTCCACAGACTGGAAGAGTCCTTCCCTGGTGGAAAG  
63 GGATAAGAAGCACGAGCGGCACCCCATCTTCGGCAACATCGTGACGAGGTGGC  
64 CTACCACGAGAAGTACCCACCATCTACCACCTGAGAAAGAACTGGTGGACAG  
65 CACCGACAAGGCCGACCTGCGGCTGATCTATCTGGCCCTGGCCACATGATCAA  
66 GTTCCGGGGCCACTTCCCTGATCGAGGGCGACCTGAACCCCGACAACAGCGACGT  
67 GGACAAGCTGTTTCATCCAGCTGGTGCAGACCTACAACCAGCTGTTTCGAGGAAAA  
68 CCCCATCAACGCCAGCGGCGTGGACGCCAAGGCCATCCTGTCTGCCAGACTGAG  
69 CAAGAGCAGACGGCTGGAATAATCTGATCGCCAGCTGCCCGGCGAGAAGAAGAA  
70 TGGCCTGTTTCGAAACCTGATTGCCCTGAGCCTGGGCCTGACCCCAACTTCAA

71 GAGCAACTTCGACCTGGCCGAGGATGCCAAACTGCAGCTGAGCAAGGACACCTA  
72 CGACGACGACCTGGACAACCTGCTGGCCCAGATCGGCGACCAGTACGCCGACCT  
73 GTTTCTGGCCGCCAAGAACCTGTCCGACGCCATCCTGCTGAGCGACATCCTGAG  
74 AGTGAACACCGAGATCACCAAGGCCCCCTGAGCGCCTCTATGATCAAGAGATAC  
75 GACGAGCACCACCAGGACCTGACCCTGCTGAAAGCTCTCGTGCGGCAGCAGCTG  
76 CCTGAGAAGTACAAAGAGATTTTCTTCGACCAGAGCAAGAACGGCTACGCCGGC  
77 TACATTGACGGCGGAGCCAGCCAGGAAGAGTTCTACAAGTTCATCAAGCCCATCC  
78 TGAAAAAGATGGACGGCACCGAGGAACTGCTCGTGAAGCTGAACAGAGAGGAC  
79 CTGCTGCGGAAGCAGCGGACCTTCGACAACGGCAGCATCCCCACCAGATCCAC  
80 CTGGGAGAGCTGCACGCCATTCTGCGGCGGCAGGAAGATTTTACCCATTCTTG  
81 AAGGACAACCGGGAAAAGATCGAGAAGATCCTGACCTTCCGCATCCCCTACTAC  
82 GTGGGCCCTCTGGCCAGGGGAAAACAGCAGATTTCGCTGGATGACCAGAAAAGAGC  
83 GAGGAAACCATCACCCCTGGAACCTTCGAGGAAAGTGGTGGACAAGGGCGCTTCC  
84 GCCCAGAGCTTCATCGAGCGGATGACCAACTTCGATAAGAACCTGCCCAACGAG  
85 AAGGTGCTGCCCAAGCACAGCCTGCTGTACGAGTACTTCACCGTGTATAACGAGC  
86 TGACCAAAGTGAAATACGTGACCGAGGGAATGAGAAAAGCCCGCCTTCTGAGCG  
87 GCGAGCAGAAAAAGGCCATCGTGGACCTGCTGTTCAAGACCAACCGGAAAAGTGA  
88 CCGTGAAGCAGCTGAAAGAGGACTACTTCAAGAAAATCGAGTGCTTCGACTCCG  
89 TGAAAATCTCCGGCGTGGAAGATCGGTTCAACGCCTCCCTGGGCACATAACCAG  
90 ATCTGCTGAAAATTATCAAGGACAAGGACTTCTGGACAATGAGGAAAACGAGG  
91 ACATTCTGGAAGATATCGTGCTGACCCTGACACTGTTTGAGGACAGAGAGATGAT  
92 CGAGGAACGGCTGAAAACCTATGCCACCTGTTTCGACGACAAAAGTGATGAAGCA  
93 GCTGAAGCGGCGGAGATACACCGGCTGGGGCAGGCTGAGCCGGAAGCTGATCA  
94 ACGGCATCCGGGACAAGCAGTCCGGCAAGACAATCCTGGATTTCTGAAAGTCCG  
95 ACGGCTTCGCCAACAGAACTTCATGCAGCTGATCCACGACGACAGCCTGACCT  
96 TTAAAGAGGACATCCAGAAAAGCCAGGTGTCCGGCCAGGGCGATAGCCTGCACG  
97 AGCACATTGCCAATCTGGCCGGCAGCCCCGCCATTAAGAAGGGCATCCTGCAGA  
98 CAGTGAAGGTGGTGGACGAGCTTGTGAAAAGTGATGGGCGGGCACAAGCCCGAG  
99 AACATCGTGATCGAAATGGCCAGAGAGAACCAGACCACCAGAAGGGACAGAAG  
100 AACAGCCGCGAGAGAATGAAGCGGATCGAAGAGGGCATCAAAGAGCTGGGCAG  
101 CCAGATCCTGAAAGAACACCCCGTGGA AAAACACCCAGCTGCAGAACGAGAAGCT  
102 GTACCTGTACTACCTGCAGAATGGGCGGGATATGTACGTGGACCAGGAACTGGAC  
103 ATCAACCGGCTGTCCGACTACGATGTGGACCATATCGTGCCTCAGAGCTTTCTGA  
104 AGGACGACTCCATCGACAACAAGGTGCTGACCAGAAGCGACAAGAACCGGGGC  
105 AAGAGCGACAACGTGCCCTCCGAAGAGGTCTGTAAGAAGATGAAGA ACTACTGG  
106 CGGCAGCTGCTGAACGCCAAGCTGATTACCAGAGAAAAGTTCGACAATCTGACC  
107 AAGGCCGAGAGAGGCGGCTGAGCGAACTGGATAAGGCCGGCTTCATCAAGAG  
108 ACAGCTGGTGGAAAACCGGCAGATCACAAAGCACGTGGCACAGATCCTGGACTC  
109 CCGGATGAACACTAAGTACGACGAGAATGACAAGCTGATCCGGGAAGTGAAAGT  
110 GATCACCTGAAGTCCAAGCTGGTGTCCGATTTCCGGAAGGATTTCCAGTTTTAC  
111 AAAGTGCGCGAGATCAACA ACTACCACCGCCACGACGCCTACCTGAACGCC  
112 GTCGTGGGAACCGCCCTGATCAAAAAGTACCCTAAGCTGGAAAAGCGAGTTCGTG  
113 TACGGCGACTACAAGGTGTACGACGTGCGGAAGATGATCGCCAAGAGCGAGCAG  
114 GAAATCGGCAAGGCTACCGCCAAGTACTTCTTCTACAGCAACATCATGAACTTTT

115 TCAAGACCGAGATTACCCTGGCCAACGGCGAGATCCGGAAGCGGCCTCTGATCG  
116 AGACAAACGGCGAAACCGGGGAGATCGTGTGGGATAAGGGCCGGGATTTTGCCA  
117 CCGTGC GGAAAGTGCTGAGCATGCCCAAGTGAATATCGTGAAAAAGACCGAGG  
118 TGCAGACAGGCGGCTTCAGCAAAGAGTCTATCCTGCCAAGAGGAACAGCGATA  
119 AGCTGATCGCCAGAAAGAAGGACTGGGACCCTAAGAAGTACGGCGGCTTCGACA  
120 GCCCCACCGTGGCCTATTCTGTGCTGGTGGTGGCCAAAAGTGGAAAAGGGCAAGT  
121 CCAAGAAACTGAAGAGTGTGAAAAGAGCTGCTGGGGATCACCATCATGGAAAGAA  
122 GCAGCTTCGAGAAGAATCCCATCGACTTTCTGGAAGCCAAGGGCTACAAAAGAAG  
123 TGAAAAAGGACCTGATCATCAAGCTGCCTAAGTACTCCCTGTTTCGAGCTGGAAAA  
124 CGGCCGGAAGAGAATGCTGGCCTCTGCCGGCGAACTGCAGAAGGGAAACGAAC  
125 TGGCCCTGCCCTCCAAATATGTGAACTTCCTGTACCTGGCCAGCCACTATGAGAA  
126 GCTGAAGGGCTCCCCCGAGGATAATGAGCAGAAACAGCTGTTTGTGGAACAGCA  
127 CAAGCACTACCTGGACGAGATCATCGAGCAGATCAGCGAGTTCCTCCAAGAGAGT  
128 GATCCTGGCCGACGCTAATCTGGACAAAGTGCTGTCCGCCTACAACAAGCACCG  
129 GGATAAGCCCATCAGAGAGCAGGCCGAGAATATCATCCACCTGTTTACCCTGACC  
130 AATCTGGGAGCCCCTGCCGCCTTCAAGTACTTTGACACCACCATCGACCGGAAG  
131 AGGTACACCAGCACCAAAGAGGTGCTGGACGCCACCCTGATCCACCAGAGCATC  
132 ACCGGCCTGTACGAGACACGGATCGACCTGTCTCAGCTGGGAGGCGACACTAGT  
133 TCCGGCGGCAGCGCTTCTCCAAAGCGTCCGCGTGACCGTCACGATGGAGAATTGGGTG  
134 GACGCAAACGTGCAAGAGGTTAA

135 nSaCas9 (D10A)-NLS

136 AAGCGAACTACATCCTGGGCCTGGCCATCGGCATCACCAGCGTGGGCTACGGC  
137 ATCATCGACTACGAGACACGGGACGTGATCGATGCCGGCGTGCGGCTGTTCAA  
138 GAGGCCAACGTGGAAAACAACGAGGGCAGGCGGAGCAAGAGAGGCGCCAGAAG  
139 GCTGAAGCGGCGGAGGGCGGCATAGAATCCAGAGAGTGAAGAAGCTGCTGTTTCA  
140 CTACAACCTGCTGACCGACCACAGCGAGCTGAGCGGCATCAACCCCTACGAGGC  
141 CAGAGTGAAGGGCCTGAGCCAGAAGCTGAGCGAGGAAGAGTTCTCTGCCGCC  
142 TGCTGCACCTGGCCAAGAGAAGAGGCGTGCAACAGTGAACGAGGTGGAAGAG  
143 GACACCGGCAACGAGCTGTCCACCAAAGAGCAGATCAGCCGGAACAGCAAGGC  
144 CCTGGAAGAGAAATACGTGGCCGAACTGCAGCTGGAACGGCTGAAGAAAGACG  
145 GCGAAGTGCGGGGCAGCATCAACAGATTCAAGACCAGCGACTACGTGAAAGAAG  
146 CCAAACAGCTGCTGAAGGTGCAGAAGGCCTACCACCAGCTGGACCAGAGCTTCA  
147 TCGACACCTACATCGACCTGCTGGAAAACCCGGCGGACCTACTATGAGGGACCTG  
148 GCGAGGGCAGCCCCTTCGGCTGGAAGGACATCAAAGAATGGTACGAGATGCTGA  
149 TGGGCCACTGCACCTACTTCCCCGAGGAACTGCGGAGCGTGAAGTACGCCTACA  
150 ACGCCGACCTGTACAACGCCCTGAACGACCTGAAACAATCTCGTGATCACCAGGG  
151 ACGAGAACGAGAAGCTGGAATATTACGAGAAGTTCCAGATCATCGAGAACGTGTT  
152 CAAGCAGAAGAAGAAGCCCACCCTGAAGCAGATCGCCAAAAGAAATCCTCGTGAA  
153 CGAAGAGGATATTAAGGGCTACAGAGTGACCAGCACCGGCAAGCCCAGTTTAC  
154 CAACCTGAAGGTGTACCACGACATCAAGGACATTACCGCCCCGAAAGAGATTATT  
155 GAGAACGCCGAGCTGCTGGATCAGATTGCCAAGATCCTGACCATCTACCAGAGC  
156 AGCGAGGACATCCAGGAAGAAGTACCAATCTGAACTCCGAGCTGACCCAGGAA  
157 GAGATCGAGCAGATCTCTAATCTGAAGGGCTATACCGGCACCCACAACCTGAGCC  
158 TGAAGGCCATCAACCTGATCCTGGACGAGCTGTGGCACACCAACGACAACCAGA

159 TCGCTATCTTCAACCGGCTGAAGCTGGTGCCCAAGAAGGTGGACCTGTCCCAGC  
160 AGAAAGAGATCCCCACCACCCTGGTGGACGACTTCATCCTGAGCCCCGTCGTGA  
161 AGAGAAGCTTCATCCAGAGCATCAAAGTGATCAACGCCATCATCAAGAAGTACGG  
162 CCTGCCCAACGACATCATTATCGAGCTGGCCCGCGAGAAGAACTCCAAGGACGC  
163 CCAGAAAATGATCAACGAGATGCAGAAGCGGAACCGGCAGACCAACGAGCGGAT  
164 CGAGGAAATCATCCGGACCACCGGCAAAGAGAACGCCAAGTACCTGATCGAGAA  
165 GATCAAGCTGCACGACATGCAGGAAGGCAAGTGCCTGTACAGCCTGGAAGCCAT  
166 CCCTCTGGAAGATCTGCTGAACAACCCCTTCAACTATGAGGTGGACCACATCATC  
167 CCCAGAAGCGTGTCTTCGACAACAGCTTCAACAACAAGGTGCTCGTGAAGCAG  
168 GAAGAAAACAGCAAGAAGGGCAACCGGACCCCATTCCAGTACCTGAGCAGCAGC  
169 GACAGCAAGATCAGCTACGAAACCTTCAAGAAGCACATCCTGAATCTGGCCAAG  
170 GGCAAGGGCAGAATCAGCAAGACCAAGAAAGAGTATCTGCTGGAAGAACGGGAC  
171 ATCAACAGGTTCTCCGTGCAGAAAAGACTTCATCAACCGGAACCTGGTGGATACCA  
172 GATACGCCACCAGAGGCCTGATGAACCTGCTGCGGAGCTACTTCAGAGTGAACA  
173 ACCTGGACGTGAAAGTGAAGTCCATCAATGGCGGCTTCACCAGCTTTCTGCGGC  
174 GGAAGTGGAAAGTTAAGAAAAGAGCGGAACAAGGGGTACAAGCACCACGCCGAG  
175 GACGCCCTGATCATTGCCAACGCCGATTTTCATCTTCAAAGAGTGGAAGAACTGG  
176 ACAAGGCCAAAAAAGTGATGGAAAACCAGATGTTTCGAGGAAAAGCAGGCCGAGA  
177 GCATGCCCCGAGATCGAAACCGAGCAGGAGTACAAAGAGATCTTCATCACCCCC  
178 ACCAGATCAAGCACATTAAGGACTTCAAGGACTACAAGTACAGCCACCGGGTGG  
179 ACAAGAAGCCTAATAGAGAGCTGATTAACGACACCCTGTACTCCACCCGGAAGGA  
180 CGACAAGGGCAACACCCTGATCGTGAACAATCTGAACGGCCTGTACGACAAGGA  
181 CAATGACAAGCTGAAAAAGCTGATCAACAAGAGCCCCGAAAAGCTGCTGATGTA  
182 CCACCACGACCCCCAGACCTACCAGAACTGAAGCTGATTATGGAACAGTACGG  
183 CGACGAGAAGAATCCCCTGTACAAGTACTACGAGGAAACCGGGAACCTACCTGAC  
184 CAAGTACTCCAAAAAGGACAACGGCCCCGTGATCAAGAAGATTAAGTATTACGGC  
185 AACAACTGAACGCCATCTGGACATCACCGACGACTACCCCAACAGCAGAAAC  
186 AAGGTCGTGAAGCTGTCCCTGAAGCCCTACAGATTCGACGTGTACCTGGACAAT  
187 GGCGTGTACAAGTTCGTGACCGTGAAGAATCTGGATGTGATCAAAAAAGAAAAC  
188 ACTACGAAGTGAATAGCAAGTGCTATGAGGAAGCTAAGAAGCTGAAGAAGATCA  
189 GCAACCAGGCCGAGTTTATCGCCTCCTTCTACAACAACGATCTGATCAAGATCAA  
190 CGGCGAGCTGTATAGAGTGATCGGCGTGAACAACGACCTGCTGAACCGGATCGA  
191 AGTGAACATGATCGACATCACCTACCGCGAGTACCTGGAAAACATGAACGACAAG  
192 AGGCCCCCCAGGATCATTAAAGACAATCGCCTCCAAGACCCAGAGCATTAAAGAAGT  
193 ACAGCACAGACATTCTGGGCAACCTGTATGAAGTGAAATCTAAGAAGCACCCCTCA  
194 GATCATCAAAAAGGGACTAGTTCCGGCGGCAGCGCTTCTCCAAAGCGTCCGCGTGAC  
195 CGTCACGATGGAGAATTGGGTGGACGCAAACGTGCAAGAGGTTAA

196 nSaKKH-Cas9 (D10A)-NLS

197 AAGCGGAACATACCTGGGCCTGGCCATCGGCATCACCGCGTGGGCTACGGC  
198 ATCATCGACTACGAGACACGGGACGTGATCGATGCCGGCGTGCGGCTGTTCAA  
199 GAGGCCAACGTGGAAAACAACGAGGGCAGGCGGAGCAAGAGAGGCGCCAGAAG  
200 GCTGAAGCGGCGGAGGCGGCATAGAATCCAGAGAGTGAAGAAGCTGCTGTTTCA  
201 CTACAACCTGCTGACCGACCACAGCGAGCTGAGCGGCATCAACCCTACGAGGC  
202 CAGAGTGAAGGGCCTGAGCCAGAAGCTGAGCGAGGAAGAGTTCTCTGCCGCC

203 TGCTGCACCTGGCCAAGAGAAGAGGCGTGCACAACGTGAACGAGGTGGAAGAG  
204 GACACCGGCAACGAGCTGTCCACCAAAGAGCAGATCAGCCGGAACAGCAAGGC  
205 CCTGGAAGAGAAATACGTGGCCGAACCTGCAGCTGGAACGGCTGAAGAAAGACG  
206 GCGAAGTGCGGGGCAGCATCAACAGATTCAAGACCAGCGACTACGTGAAAGAAG  
207 CCAAACAGCTGCTGAAGGTGCAGAAGGCCTACCACCAGCTGGACCAGAGCTTCA  
208 TCGACACCTACATCGACCTGCTGGAAAACCCGGCGGACCTACTATGAGGGACCTG  
209 GCGAGGGCAGCCCCTTCGGCTGGAAGGACATCAAAGAATGGTACGAGATGCTGA  
210 TGGGCCACTGCACCTACTTCCCCGAGGAACTGCGGAGCGTGAAGTACGCCTACA  
211 ACGCCGACCTGTACAACGCCCTGAACGACCTGAACAATCTCGTGATCACCAGGG  
212 ACGAGAACGAGAAGCTGGAATATTACGAGAAGTTCCAGATCATCGAGAACGTGTT  
213 CAAGCAGAAGAAGAAGCCACCCTGAAGCAGATCGCCAAAAGAAATCCTCGTGAA  
214 CGAAGAGGATATTAAGGGCTACAGAGTGACCAGCACCGGCAAGCCCGAGTTCAC  
215 CAACCTGAAGGTGTACCACGACATCAAGGACATTACCGCCCGGAAAGAGATTATT  
216 GAGAACGCCGAGCTGCTGGATCAGATTGCCAAGATCCTGACCATCTACCAGAGC  
217 AGCGAGGACATCCAGGAAGAAGTACCAATCTGAACTCCGAGCTGACCCAGGAA  
218 GAGATCGAGCAGATCTCTAATCTGAAGGGCTATACCGGCACCCACAACCTGAGCC  
219 TGAAGGCCATCAACCTGATCCTGGACGAGCTGTGGCACACCAACGACAACCAGA  
220 TCGCTATCTTCAACCGGCTGAAGCTGGTGCCCAAGAAGGTGGACCTGTCCCAGC  
221 AGAAAGAGATCCCCACCACCCTGGTGGACGACTTCATCCTGAGCCCCGTCGTGA  
222 AGAGAAGCTTCATCCAGAGCATCAAAGTGATCAACGCCATCATCAAGAAGTACGG  
223 CCTGCCCAACGACATCATTATCGAGCTGGCCCGCGAGAAGAAGTCCAAGGACGC  
224 CCAGAAAATGATCAACGAGATGCAGAAGCGGAACCGGCAGACCAACGAGCGGAT  
225 CGAGGAAATCATCCGGACCACCGGCAAAGAGAACGCCAAGTACCTGATCGAGAA  
226 GATCAAGCTGCACGACATGCAGGAAGGCAAGTGCCTGTACAGCCTGGAAGCCAT  
227 CCCTCTGGAAGATCTGCTGAACAACCCCTTCAACTATGAGGTGGACCACATCATC  
228 CCCAGAAGCGTGTCTTCGACAACAGCTTCAACAACAAGGTGCTCGTGAAGCAG  
229 GAAGAAAACAGCAAGAAGGGCAACCGGACCCCATTCCAGTACCTGAGCAGCAGC  
230 GACAGCAAGATCAGCTACGAAACCTTCAAGAAGCACATCCTGAATCTGGCCAAG  
231 GGCAAGGGCAGAATCAGCAAGACCAAGAAAAGAGTATCTGCTGGAAGAACGGGAC  
232 ATCAACAGGTTCTCCGTGCAGAAAAGACTTCATCAACCGGAACCTGGTGGATACCA  
233 GATACGCCACCAGAGGCCTGATGAACCTGCTGCGGAGCTACTTCAGAGTGAACA  
234 ACCTGGACGTGAAAGTGAAGTCCATCAATGGCGGCTTCACCAGCTTTCTGCGGC  
235 GGAAGTGAAGTTTAAAGAAAAGAGCGGAACAAGGGGTACAAGCACCACGCCGAG  
236 GACGCCCTGATCATTGCCAACGCCGATTTTCATCTTCAAAGAGTGGAAGAAACTGG  
237 ACAAGGCCAAAAAAGTGATGGAAAACCAAGATGTTTCGAGGAAAAGCAGGCCGAGA  
238 GCATGCCCCGAGATCGAAACCGAGCAGGAGTACAAAGAGATCTTCATCACCCCCC  
239 ACCAGATCAAGCACATTAAGGACTTCAAGGACTACAAGTACAGCCACCGGGTGG  
240 ACAAGAAGCCTAATAGAAAAGCTGATTAACGACACCCTGTACTCCACCCGGAAGGA  
241 CGACAAGGGCAACACCCTGATCGTGAACAATCTGAACGGCCTGTACGACAAGGA  
242 CAATGACAAGCTGAAAAAGCTGATCAACAAGAGCCCCGAAAAGCTGCTGATGTA  
243 CCACCACGACCCCGAGACCTACCAGAACTGAAGCTGATTATGGAACAGTACGG  
244 CGACGAGAAGAATCCCCTGTACAAGTACTACGAGGAAACCGGGAACCTACCTGAC  
245 CAAGTACTCCAAAAGGACAACGGCCCCGTGATCAAGAAGATTAAGTATTACGGC  
246 AACAACTGAACGCCATCTGGACATCACCGACGACTACCCCAACAGCAGAAAC

247 AAGGTCGTGAAGCTGTCCCTGAAGCCCTACAGATTCGACGTGTACCTGGACAAT  
248 GGCGTGTACAAGTTCGTGACCGTGAAGAATCTGGATGTGATCAAAAAAGAAAAT  
249 ACTACGAAGTGAATAGCAAGTGCTATGAGGAAGCTAAGAAGCTGAAGAAGATCA  
250 GCAACCAGGCCGAGTTTATCGCCTCCTTCTACAAGAACGATCTGATCAAGATCAA  
251 CGGCGAGCTGTATAGAGTGATCGGCGTGAACAACGACCTGCTGAACCGGATCGA  
252 AGTGAACATGATCGACATCACCTACCGCGAGTACCTGGAAAACATGAACGACAAG  
253 AGGCCCCCCCACATCATTAAAGACAATCGCCTCCAAGACCCAGAGCATTAAAGAAGT  
254 ACAGCACAGACATTCTGGGCAACCTGTATGAAGTGAAATCTAAGAAGCACCCCTCA  
255 GATCATCAAAAAGGGACTAGTTCCGGCGGCAGCGCTTCTCCAAAGCGTCCGCGTGAC  
256 CGTCACGATGGAGAATTGGGTGGACGCAAACGTGCAAGAGGTTAA  
257  
258  
259  
260  
261  
262  
263  
264  
265  
266  
267  
268  
269  
270  
271  
272  
273  
274  
275  
276  
277  
278  
279

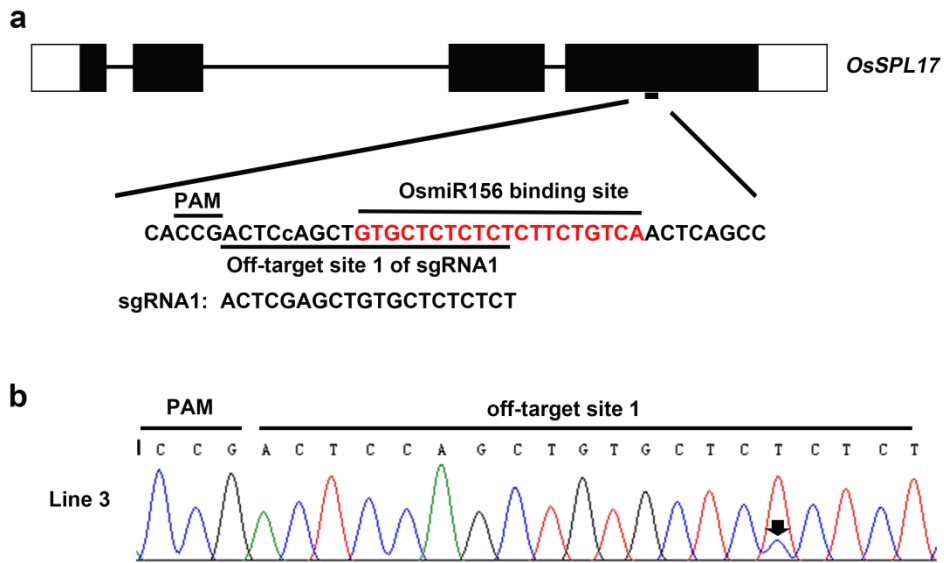

280

281 **Supplemental Figure 1.** Off-target editing at *OsSPL17* by ABE-P1S. **a**, Schematic

282 view of the potential off-target site 1 of sgRNA1 in *OsSPL17*. The mismatch base in

283 *OsSPL17* is shown in lowercase. The OsmiR156 binding site in *OsSPL17* is highlighted

284 in red. **b**, Sequencing chromatogram of Line 3 at the potential off-target site 1 in

285 *OsSPL17*. Arrow points to the position with an edited base.

286

287

288

289

290

291

292

293

294

295

296

297

298

299

300

301



302 **Supplemental Table 1** The base editing windows of ABE-P1 and ABE-P1S at  
 303 different target sites.

| sgRNA  | Target gene      | Base editor | Genotype of mutations                                                                                                                                                                                                                                                                                                                                                                                                                                                                                                                                                                                                                            | Base editing positions |
|--------|------------------|-------------|--------------------------------------------------------------------------------------------------------------------------------------------------------------------------------------------------------------------------------------------------------------------------------------------------------------------------------------------------------------------------------------------------------------------------------------------------------------------------------------------------------------------------------------------------------------------------------------------------------------------------------------------------|------------------------|
| sgRNA1 | <i>OsSPL14</i>   | ABE-P1      | T <sub>5</sub> -C <sub>5</sub> (6), T <sub>10</sub> -C <sub>10</sub> (4), T <sub>5</sub> T <sub>7</sub> -C <sub>5</sub> C <sub>7</sub> (6), T <sub>5</sub> T <sub>10</sub> -C <sub>5</sub> C <sub>10</sub> (2)                                                                                                                                                                                                                                                                                                                                                                                                                                   | 5, 7, 10               |
|        |                  | ABE-P1S     | T <sub>7</sub> -C <sub>7</sub> (1), T <sub>5</sub> T <sub>7</sub> -C <sub>5</sub> C <sub>7</sub> (3), T <sub>5</sub> -T <sub>10</sub> (1), T <sub>1</sub> T <sub>5</sub> T <sub>7</sub> -C <sub>1</sub> C <sub>5</sub> C <sub>7</sub> (1), T <sub>5</sub> T <sub>7</sub> T <sub>10</sub> -C <sub>5</sub> C <sub>7</sub> C <sub>10</sub> (4),<br>T <sub>5</sub> T <sub>7</sub> T <sub>10</sub> T <sub>12</sub> -C <sub>5</sub> C <sub>7</sub> C <sub>10</sub> C <sub>12</sub> (1), T <sub>3</sub> T <sub>5</sub> T <sub>7</sub> T <sub>10</sub> T <sub>12</sub> -C <sub>3</sub> C <sub>5</sub> C <sub>7</sub> C <sub>10</sub> C <sub>12</sub> (1) | 1, 3, 5, 7, 10, 12     |
|        |                  |             |                                                                                                                                                                                                                                                                                                                                                                                                                                                                                                                                                                                                                                                  |                        |
| sgRNA2 | <i>SLR1</i>      | ABE-P1      | T <sub>6</sub> -C <sub>6</sub> (7)                                                                                                                                                                                                                                                                                                                                                                                                                                                                                                                                                                                                               | 6                      |
|        |                  | ABE-P1S     | T <sub>6</sub> -C <sub>6</sub> (7)                                                                                                                                                                                                                                                                                                                                                                                                                                                                                                                                                                                                               | 6                      |
| sgRNA3 | <i>OsSERK2</i>   | ABE-P1      | T <sub>6</sub> -C <sub>6</sub> (21), T <sub>6</sub> T <sub>8</sub> -C <sub>6</sub> C <sub>8</sub> (5)                                                                                                                                                                                                                                                                                                                                                                                                                                                                                                                                            | 6, 8                   |
|        |                  | ABE-P1S     | T <sub>6</sub> -C <sub>6</sub> (11), T <sub>6</sub> T <sub>8</sub> -C <sub>6</sub> C <sub>8</sub> (10)                                                                                                                                                                                                                                                                                                                                                                                                                                                                                                                                           | 6, 8                   |
| sgRNA4 | <i>Tms9-1</i>    | ABE-P1      | T <sub>5</sub> -C <sub>5</sub> (1)                                                                                                                                                                                                                                                                                                                                                                                                                                                                                                                                                                                                               | 5                      |
|        |                  | ABE-P1S     | T <sub>5</sub> -C <sub>5</sub> (4)                                                                                                                                                                                                                                                                                                                                                                                                                                                                                                                                                                                                               | 5                      |
| sgRNA5 | <i>OsNRT1.1B</i> | ABE-P1      | A <sub>4</sub> -G <sub>4</sub> (1), A <sub>6</sub> -G <sub>6</sub> (2), A <sub>8</sub> -G <sub>8</sub> (6), A <sub>4</sub> A <sub>6</sub> -G <sub>4</sub> G <sub>6</sub> (1), A <sub>6</sub> A <sub>8</sub> -G <sub>6</sub> G <sub>8</sub> (1),<br>A <sub>4</sub> A <sub>6</sub> A <sub>8</sub> -G <sub>4</sub> G <sub>6</sub> G <sub>8</sub> (15), A <sub>4</sub> A <sub>6</sub> A <sub>8</sub> A <sub>12</sub> -G <sub>4</sub> G <sub>6</sub> G <sub>8</sub> G <sub>12</sub> (1)                                                                                                                                                               | 4, 6, 8, 12            |
|        |                  | ABE-P1S     | A <sub>6</sub> -G <sub>6</sub> (4), A <sub>8</sub> -G <sub>8</sub> (2), A <sub>4</sub> A <sub>6</sub> -G <sub>4</sub> G <sub>6</sub> (1), A <sub>4</sub> A <sub>8</sub> -G <sub>4</sub> G <sub>8</sub> (3), A <sub>6</sub> A <sub>8</sub> -G <sub>6</sub> G <sub>8</sub> (9),<br>A <sub>4</sub> A <sub>6</sub> A <sub>8</sub> -G <sub>4</sub> G <sub>6</sub> G <sub>8</sub> (32), A <sub>4</sub> A <sub>6</sub> A <sub>8</sub> A <sub>12</sub> -G <sub>4</sub> G <sub>6</sub> G <sub>8</sub> C <sub>12</sub> (1)                                                                                                                                 | 4, 6, 8, 12            |
|        |                  |             |                                                                                                                                                                                                                                                                                                                                                                                                                                                                                                                                                                                                                                                  |                        |
| sgRNA6 | <i>OsACC1</i>    | ABE-P1      | T <sub>1</sub> -C <sub>4</sub> (6), T <sub>7</sub> -C <sub>7</sub> (5), T <sub>1</sub> T <sub>7</sub> -C <sub>4</sub> C <sub>7</sub> (14)                                                                                                                                                                                                                                                                                                                                                                                                                                                                                                        | 4, 7                   |
|        |                  | ABE-P1S     | T <sub>4</sub> -C <sub>4</sub> (1), T <sub>7</sub> -C <sub>7</sub> (20), T <sub>2</sub> T <sub>7</sub> -C <sub>2</sub> C <sub>7</sub> (1), T <sub>4</sub> T <sub>7</sub> -C <sub>4</sub> C <sub>7</sub> (9)                                                                                                                                                                                                                                                                                                                                                                                                                                      | 2, 4, 7                |
| sgRNA7 | <i>OsDEP1</i>    | ABE-P1      | A <sub>5</sub> -G <sub>5</sub> (1), A <sub>6</sub> -G <sub>6</sub> (1), A <sub>5</sub> A <sub>6</sub> -G <sub>5</sub> G <sub>6</sub> (30), A <sub>3</sub> A <sub>5</sub> A <sub>6</sub> -G <sub>3</sub> G <sub>5</sub> G <sub>6</sub> (8)                                                                                                                                                                                                                                                                                                                                                                                                        | 3, 5, 6                |
|        |                  | ABE-P1S     | A <sub>5</sub> A <sub>6</sub> -G <sub>5</sub> G <sub>6</sub> (21), A <sub>3</sub> A <sub>5</sub> A <sub>6</sub> -G <sub>3</sub> G <sub>5</sub> G <sub>6</sub> (4)                                                                                                                                                                                                                                                                                                                                                                                                                                                                                | 3, 5, 6                |

304 Note: For the base editors ABE-P1 and ABE-P1S, the base editing position was  
 305 counted from the PAM-distal end, scoring the PAM sequence as positions 21-23.

306  
 307  
 308  
 309  
 310  
 311  
 312  
 313  
 314  
 315  
 316  
 317  
 318  
 319  
 320  
 321  
 322

323 **Supplemental Table 2** The base editing windows of ABE-P2, ABE-P2S, ABE-P5 and  
 324 ABE-P5S at different target sites.

| sgRNA   | Target gene                                                                                                 | Base editor    | Genotype of mutations                                                                                                                                                                                                                                                                                                                                                                                                                                                                                                                                                                                                                                                                                                      | Base editing positions                                                                                                                                                                                                                                                                                                                                                                                                                                                                      |
|---------|-------------------------------------------------------------------------------------------------------------|----------------|----------------------------------------------------------------------------------------------------------------------------------------------------------------------------------------------------------------------------------------------------------------------------------------------------------------------------------------------------------------------------------------------------------------------------------------------------------------------------------------------------------------------------------------------------------------------------------------------------------------------------------------------------------------------------------------------------------------------------|---------------------------------------------------------------------------------------------------------------------------------------------------------------------------------------------------------------------------------------------------------------------------------------------------------------------------------------------------------------------------------------------------------------------------------------------------------------------------------------------|
| sgRNA8  | <i>SPX-MSF2</i>                                                                                             | ABE-P2         | T <sub>1</sub> -C <sub>1</sub> (1), T <sub>9</sub> -C <sub>9</sub> (2), T <sub>15</sub> -C <sub>15</sub> (1)                                                                                                                                                                                                                                                                                                                                                                                                                                                                                                                                                                                                               | 1, 9, 15                                                                                                                                                                                                                                                                                                                                                                                                                                                                                    |
|         |                                                                                                             | ABE-P2S        | T <sub>3</sub> -C <sub>3</sub> (1), T <sub>6</sub> -C <sub>6</sub> (1), T <sub>9</sub> -C <sub>9</sub> (3), T <sub>15</sub> -C <sub>15</sub> (1), T <sub>9</sub> T <sub>12</sub> -C <sub>9</sub> C <sub>12</sub> (1)                                                                                                                                                                                                                                                                                                                                                                                                                                                                                                       | 3, 6, 9, 12, 15                                                                                                                                                                                                                                                                                                                                                                                                                                                                             |
| sgRNA9  | <i>OsSPL14</i>                                                                                              | ABE-P2         | T <sub>6</sub> -C <sub>6</sub> (1), T <sub>10</sub> -C <sub>10</sub> (3), T <sub>6</sub> T <sub>10</sub> -C <sub>6</sub> C <sub>10</sub> (2), T <sub>8</sub> T <sub>10</sub> -C <sub>8</sub> C <sub>10</sub> (3), T <sub>6</sub> T <sub>8</sub> T <sub>10</sub> -C <sub>6</sub> C <sub>8</sub> C <sub>10</sub> (1),<br>T <sub>10</sub> T <sub>14</sub> -C <sub>10</sub> C <sub>14</sub> (1)                                                                                                                                                                                                                                                                                                                                | 6, 8, 10, 14                                                                                                                                                                                                                                                                                                                                                                                                                                                                                |
|         |                                                                                                             | <i>OsSPL17</i> | ABE-P2                                                                                                                                                                                                                                                                                                                                                                                                                                                                                                                                                                                                                                                                                                                     | T <sub>8</sub> -C <sub>8</sub> (2), T <sub>12</sub> -C <sub>12</sub> (2), T <sub>8</sub> T <sub>10</sub> -C <sub>8</sub> C <sub>10</sub> (3), T <sub>6</sub> T <sub>10</sub> T <sub>12</sub> -C <sub>6</sub> C <sub>10</sub> C <sub>12</sub> (3), T <sub>8</sub> T <sub>10</sub> T <sub>12</sub> -C <sub>8</sub> C <sub>10</sub> C <sub>12</sub> (2),<br>T <sub>8</sub> T <sub>10</sub> T <sub>12</sub> T <sub>14</sub> -C <sub>8</sub> C <sub>10</sub> C <sub>12</sub> C <sub>14</sub> (1) |
|         | <i>OsSPL14</i>                                                                                              | ABE-P2S        | T <sub>8</sub> -C <sub>8</sub> (1), T <sub>10</sub> -C <sub>10</sub> (6), T <sub>12</sub> -C <sub>12</sub> (4), T <sub>14</sub> -C <sub>14</sub> (1), T <sub>8</sub> T <sub>10</sub> -C <sub>8</sub> C <sub>10</sub> (1), T <sub>8</sub> T <sub>12</sub> -C <sub>8</sub> C <sub>12</sub> (1),<br>T <sub>8</sub> T <sub>14</sub> -C <sub>8</sub> C <sub>14</sub> (2), T <sub>10</sub> T <sub>14</sub> -C <sub>10</sub> C <sub>14</sub> (1), T <sub>12</sub> T <sub>14</sub> -C <sub>12</sub> C <sub>14</sub> (1), T <sub>8</sub> T <sub>12</sub> T <sub>14</sub> -C <sub>8</sub> C <sub>12</sub> C <sub>14</sub> (1),<br>T <sub>6</sub> T <sub>12</sub> T <sub>17</sub> -C <sub>6</sub> C <sub>12</sub> C <sub>17</sub> (1) | 6, 8, 10, 12, 14, 17                                                                                                                                                                                                                                                                                                                                                                                                                                                                        |
|         | <i>OsSPL17</i>                                                                                              | ABE-P2S        | T <sub>8</sub> -C <sub>8</sub> (2), T <sub>10</sub> -C <sub>10</sub> (7), T <sub>12</sub> -C <sub>12</sub> (2), T <sub>8</sub> T <sub>10</sub> -C <sub>8</sub> C <sub>10</sub> (4), T <sub>8</sub> T <sub>12</sub> -C <sub>8</sub> C <sub>12</sub> (1), T <sub>10</sub> T <sub>12</sub> -C <sub>10</sub> C <sub>12</sub><br>(1), T <sub>10</sub> T <sub>14</sub> -C <sub>10</sub> C <sub>14</sub> (2), T <sub>8</sub> T <sub>10</sub> T <sub>12</sub> -C <sub>8</sub> C <sub>10</sub> C <sub>12</sub> (2), T <sub>10</sub> T <sub>12</sub> T <sub>14</sub> -C <sub>10</sub> C <sub>12</sub> C <sub>14</sub> (1)                                                                                                            | 8, 10, 12, 14                                                                                                                                                                                                                                                                                                                                                                                                                                                                               |
|         | <i>OsSPL16</i>                                                                                              | ABE-P2S        | T <sub>10</sub> -C <sub>10</sub> (4), T <sub>12</sub> -C <sub>12</sub> (1), T <sub>14</sub> -C <sub>14</sub> (2), T <sub>6</sub> T <sub>8</sub> -C <sub>6</sub> C <sub>8</sub> (1), T <sub>10</sub> T <sub>12</sub> -C <sub>10</sub> C <sub>12</sub> (1),<br>T <sub>12</sub> T <sub>14</sub> -C <sub>12</sub> C <sub>14</sub> (1)                                                                                                                                                                                                                                                                                                                                                                                          | 6, 8, 10, 12, 14                                                                                                                                                                                                                                                                                                                                                                                                                                                                            |
| sgRNA10 | <i>OsSPL18</i>                                                                                              | ABE-P2S        | T <sub>10</sub> -C <sub>10</sub> (2), T <sub>12</sub> -C <sub>12</sub> (2), T <sub>14</sub> -C <sub>14</sub> (2), T <sub>17</sub> -C <sub>17</sub> (1), T <sub>8</sub> T <sub>12</sub> -C <sub>8</sub> C <sub>12</sub> (1), T <sub>10</sub> T <sub>12</sub> -C <sub>10</sub> C <sub>12</sub> (3),<br>T <sub>10</sub> T <sub>14</sub> -C <sub>10</sub> C <sub>14</sub> (2), T <sub>10</sub> T <sub>12</sub> T <sub>14</sub> -C <sub>10</sub> C <sub>12</sub> C <sub>14</sub> (1)                                                                                                                                                                                                                                            | 8, 10, 12, 14, 17                                                                                                                                                                                                                                                                                                                                                                                                                                                                           |
|         |                                                                                                             | <i>OsSPL13</i> | ABE-P5                                                                                                                                                                                                                                                                                                                                                                                                                                                                                                                                                                                                                                                                                                                     | T <sub>11</sub> -C <sub>11</sub> (1)                                                                                                                                                                                                                                                                                                                                                                                                                                                        |
| sgRNA11 | <i>OsSPL13</i>                                                                                              | ABE-P5S        | T <sub>9</sub> -C <sub>9</sub> (1), T <sub>7</sub> -C <sub>7</sub> (1)                                                                                                                                                                                                                                                                                                                                                                                                                                                                                                                                                                                                                                                     | 7, 9                                                                                                                                                                                                                                                                                                                                                                                                                                                                                        |
|         |                                                                                                             | sgRNA12        | <i>SNB</i>                                                                                                                                                                                                                                                                                                                                                                                                                                                                                                                                                                                                                                                                                                                 | ABE-P5                                                                                                                                                                                                                                                                                                                                                                                                                                                                                      |
| ABE-P5S | A <sub>4</sub> -G <sub>4</sub> (1), A <sub>8</sub> -G <sub>8</sub> (2), A <sub>9</sub> -G <sub>9</sub> (18) |                |                                                                                                                                                                                                                                                                                                                                                                                                                                                                                                                                                                                                                                                                                                                            | 4, 8, 9                                                                                                                                                                                                                                                                                                                                                                                                                                                                                     |

325 Note: For the base editors ABE-P2, ABE-P2S, ABE-P5 and ABE-P5S, the base editing  
 326 position was counted from the PAM-distal end, scoring the PAM sequence as positions  
 327 22-27.

328  
 329  
 330  
 331  
 332  
 333  
 334  
 335  
 336  
 337  
 338  
 339  
 340  
 341  
 342

343 **Supplemental Table 3** The base editing frequencies of ABE-P1 and ABE-P1S at  
 344 potential off-target sites of sgRNA1.

| Site         | Chr | Position | Guide-PAM sequence      | Base editor | Mismatch numbers | Number of genotyped lines | Number of edited lines | Editing efficiency |
|--------------|-----|----------|-------------------------|-------------|------------------|---------------------------|------------------------|--------------------|
| On target    | 8   | 25275163 | AGAGAGAGCACAGCTCGAGTCGG | ABE-P1      | 0                | 48                        | 18                     | 37.5%              |
|              |     |          |                         | ABE-P1S     | 0                | 17                        | 12                     | 70.6%              |
| Off-target 1 | 9   | 18918918 | AGAGAGAGCACAGCTgGAGTCGG | ABE-P1      | 1                | 8                         | 0                      | 0                  |
|              |     |          |                         | ABE-P1S     | 1                | 8                         | 1                      | 12.5%              |
| Off-target 2 | 1   | 24179644 | tGAtcGgGCACAGCTCGcGTCGG | ABE-P1      | 5                | 8                         | 0                      | 0                  |
|              |     |          |                         | ABE-P1S     | 5                | 8                         | 0                      | 0                  |
| Off-target 3 | 3   | 36137080 | AGAaAGAGCAtgGgTCGAGTCGG | ABE-P1      | 4                | 8                         | 0                      | 0                  |
|              |     |          |                         | ABE-P1S     | 4                | 8                         | 0                      | 0                  |
| Off-target 4 | 3   | 8596704  | AGAGtGAGCACAGCggGAGaCGG | ABE-P1      | 4                | 8                         | 0                      | 0                  |
|              |     |          |                         | ABE-P1S     | 4                | 8                         | 0                      | 0                  |
| Off-target 5 | 4   | 23025825 | gGAGAGcGCgCgGCTCGAGgCGG | ABE-P1      | 5                | 8                         | 0                      | 0                  |
|              |     |          |                         | ABE-P1S     | 5                | 8                         | 0                      | 0                  |
| Off-target 6 | 5   | 10284901 | AGAGtGtGCAgAGtTCGAGTCGG | ABE-P1      | 4                | 8                         | 0                      | 0                  |
|              |     |          |                         | ABE-P1S     | 4                | 8                         | 0                      | 0                  |
| Off-target 7 | 7   | 19030423 | AGAGAGAGCtCgGCTCGgcTCGG | ABE-P1      | 4                | 8                         | 0                      | 0                  |
|              |     |          |                         | ABE-P1S     | 4                | 8                         | 0                      | 0                  |
| Off-target 8 | 10  | 1012640  | AGAGAGAtCtCAGaTCGAGgCGG | ABE-P1      | 4                | 8                         | 0                      | 0                  |
|              |     |          |                         | ABE-P1S     | 4                | 8                         | 0                      | 0                  |
| Off-target 9 | 7   | 20804240 | AGAcAGAGCACAGCaaGAaTCGG | ABE-P1      | 4                | 8                         | 0                      | 0                  |
|              |     |          |                         | ABE-P1S     | 4                | 8                         | 0                      | 0                  |

345 Note: Nucleotides of PAM sequence are written in bold, and the mismatch bases in  
 346 potential off-targets are shown in lowercase.

347  
 348  
 349  
 350  
 351  
 352  
 353  
 354  
 355  
 356  
 357  
 358

359 **Supplemental Table 4** The base editing frequencies of ABE-P1 and ABE-P1S at  
 360 potential off-target sites of sgRNA6.

| Site         | Chr | Position | Guide-PAM sequence              | Base editor | Mismatch numbers | Number of genotyped lines | Number of edited lines | Editing efficiency |
|--------------|-----|----------|---------------------------------|-------------|------------------|---------------------------|------------------------|--------------------|
| On target    | 5   | 13065463 | CCCAGACCGCATTGAGTGTATG          | ABE-P1      | 0                | 36                        | 25                     | 69.4%              |
|              |     |          |                                 | ABE-P1S     | 0                | 42                        | 31                     | 73.8%              |
| Off-target 1 | 8   | 22061977 | CATAGCACTCAActCaGT <b>TGGG</b>  | ABE-P1      | 4                | 8                         | 0                      | 0                  |
|              |     |          |                                 | ABE-P1S     | 4                | 8                         | 0                      | 0                  |
| Off-target 2 | 5   | 17365477 | aATAGCACTCA <b>TGaGaTCTTGG</b>  | ABE-P1      | 4                | 8                         | 0                      | 0                  |
|              |     |          |                                 | ABE-P1S     | 4                | 8                         | 0                      | 0                  |
| Off-target 3 | 3   | 26476439 | CATAGCACT <b>lAATGtGGgCgGAG</b> | ABE-P1      | 4                | 8                         | 0                      | 0                  |
|              |     |          |                                 | ABE-P1S     | 4                | 8                         | 0                      | 0                  |

361 Note: Nucleotides of PAM sequence are written in bold, and the mismatch bases in  
 362 potential off-targets are shown in lowercase.

363

364 **Supplemental Table 5** The base editing frequencies of ABE-P2S at potential off-target  
 365 sites of sgRNA9.

| Site         | Chr | Position | Guide-PAM sequence                  | Mismatch numbers | Number of genotyped lines | Number of edited lines | Editing efficiency |
|--------------|-----|----------|-------------------------------------|------------------|---------------------------|------------------------|--------------------|
| On target 1  | 8   | 25275156 | ACAGAAGAGAGAGAGCACAG <b>CTCGAGT</b> | 0                | 36                        | 20                     | 55.6%              |
| On target 2  | 9   | 18918911 | ACAGAAGAGAGAGAGCACAG <b>CTGGAGT</b> | 0                | 36                        | 22                     | 61.1%              |
| Off-target 1 | 9   | 19647839 | ACAGAAGAGAGAGAGCACAct <b>CGGAGT</b> | 2                | 8                         | 0                      | 0                  |
| Off-target 2 | 11  | 17631827 | ACAGAAGAGAGAGAGCACAct <b>CCGGGT</b> | 2                | 8                         | 0                      | 0                  |
| Off-target 3 | 8   | 26505555 | ACAGAAGAGAGAGAGCACAct <b>CCGGGT</b> | 2                | 8                         | 0                      | 0                  |
| Off-target 4 | 3   | 36137083 | ACgGAAGAGAAAGAGCA <b>tGgTCGAGT</b>  | 5                | 8                         | 0                      | 0                  |

366 Note: Nucleotides of PAM sequence are written in bold, and the mismatch bases in  
 367 potential off-targets are shown in lowercase.

368

369

370

371

372

373

374

375

376

**Supplemental Table 6** The target sites and primers for all sgRNAs used in this study.

| sgRNA   | Target site           | Forward primer 5'-3'        | Reverse Primer 5'-3'       |
|---------|-----------------------|-----------------------------|----------------------------|
| sgRNA1  | AGAGAGAGCACAGCTCGAGT  | TGTGAGAGAGAGCACAGCTCGAGT    | AAACTCGAGCTGTGCTCTCTCT     |
| sgRNA2  | AGTGCACGGTGTCCGTGGCC  | TGTGAGTGCACGGTGTCCGTGGCC    | AAACGGCCACGGACACCGTGCCT    |
| sgRNA3  | GCCGGACAGCTCCATTGCC   | TGTGGCCGGACAGCTCCATTGCC     | AAACGGCAATGGAGCTGTCCGGC    |
| sgRNA4  | GCCGAGGCTGAGCAGCTTG   | TGTGGCCGAGGCTGAGCAGCTTG     | AAACCAAGCTGCTCAGCCTCGGC    |
| sgRNA5  | ACTAGATATCTAAACCATTA  | TGTGACTAGATACTAAACCATTA     | AAACTAATGGTTTAGATACTAGT    |
| sgRNA6  | CATAGCACTCAATGCGGTCT  | TGTGCATAGCACTCAATGCGGTCT    | AAACAGACCCGATTGAGTGTATG    |
| sgRNA7  | AGACAAGCTTGGCCCTCTTT  | TGTGAGACAAGCTTGGCCCTCTTT    | AAACAAAGAGGGCCAAGCTTGTCT   |
| sgRNA8  | AGATGACCATCAACAAATCCA | TGTGTGAGATGACCATCAACAAATCCA | AAACTGGATTGTGTGATGGTCACTCA |
| sgRNA9  | ACAGAAGAGAGAGAGCACAGC | TGTGTGACAGAAGAGAGAGAGCACAGC | AAACGCTGTGCTCTCTCTCTCTGTCA |
| sgRNA10 | ACAGAAGAGAGAGAGCACAAT | TGTGTGACAGAAGAGAGAGAGCACAAT | AAACATTGTGCTCTCTCTCTCTGTCA |
| sgRNA11 | ACAGAAGAGAGGGAGCATGC  | TGTGTGACAGAAGAGAGGGAGCATGC  | AAACGCATGCTCCCTCTCTCTGTCA  |
| sgRNA12 | CGTAGAGAATCCTGATGATGC | TGTGTGCGTAGAGAATCCTGATGATGC | AAACGCATCATCAGATTCTCTACGCA |

**Supplemental Table 7** Primers for on-target site amplification and sequencing.

| Primer name    | Primer sequence 5'-3'     | Purpose                                     |
|----------------|---------------------------|---------------------------------------------|
| OsSPL14-F      | AGGGTTCCAAGCAGCGTAAGGA    | Amplify all the <i>OsSPL14</i> target sites |
| OsSPL14-R      | TGGTGCTGGGGCTGGACCGTTC    |                                             |
| OsSPL14seq-F   | TCTCCGGTGGTATCCAGTGGCAC   | Sanger sequencing primer                    |
| SLR1-F         | GCGCAATTATTACTAGCTATAGC   | Amplify the <i>SLR1</i> target site         |
| SLR1-R         | AGCCGTCGCCACCACCGTAAGG    |                                             |
| SLR1seq-F      | CGTCGACGAGCTGCTGGCG       | Sanger sequencing primer                    |
| OsSERK2-F      | CCATCTGCACGCATGACTT       | Amplify the <i>OsSERK2</i> target site      |
| OsSERK2-R      | AGAGTTGTACGTACAATACAGCAG  |                                             |
| OsSERK2seq-F   | GCTTCGTGGAGCATGAGGT       | Sanger sequencing primer                    |
| Tms9-1-F       | TGCCGTCGTACCGGCAGTCG      | Amplify the <i>Tms9-1</i> target site       |
| Tms9-1-R       | CACGAGGCCTCCGACATGATGC    |                                             |
| Tms9-1seq-F    | CTCCATGCCGCTCTGCGTGCTG    | Sanger sequencing primer                    |
| OsNRT1.1B-F    | GGGAGTTTCATGATTGGAGGCACG  | Amplify the <i>OsNRT1.1B</i> target site    |
| OsNRT1.1B-R    | GTGCTACCTCGCCAGTGCTCATC   |                                             |
| OsNRT1.1Bseq-F | CTGTGACATTTGCAACCACAC     | Sanger sequencing primer                    |
| OsACC1-F       | GCAATCTGTTTCCTCGTGCTGGAC  | Amplify the <i>OsACC1</i> target site       |
| OsACC1-R       | CTTGAAGCGATTTGTGTGTCAGCAC |                                             |
| OsACC1seq-F    | GGCATTGCTGGACTTCAACCG     | Sanger sequencing primer                    |
| OsDEP1-F       | CTCTTTCACACTCGCTCGCTCG    | Amplify the <i>OsDEP1</i> target site       |
| OsDEP1-R       | AGCACAGCACAGTGTCAAGAAC    |                                             |
| OsDEP1seq-F    | AGGAGATCCGATTCGCCGCG      | Sanger sequencing primer                    |
| SPX-MSF2-F     | AGCACACACACAGACAGTGTGTC   | Amplify the <i>SPX-MSF2</i> target site     |
| SPX-MSF2-R     | GGCAACTTAGGTTGGCATTGCC    |                                             |
| SPX-MSF2seq-F  | CGCTGCATGCATGCAGGCGCGT    | Sanger sequencing primer                    |
| OsSPL17-F      | GGGTTCCAAGCAGTGTGAGGGA    | Amplify the <i>OsSPL17</i> target site      |
| OsSPL17-R      | GGACCTCGTTCAGCACAACCC     |                                             |

|              |                           |                                        |
|--------------|---------------------------|----------------------------------------|
| OsSPL17seq-F | ATGAACTCCATCCTCACCGCAG    | Sanger sequencing primer               |
| OsSPL16-F    | TTGGCATCAGCAGCAGGCAGCAG   | Amplify the <i>OsSPL16</i> target site |
| OsSPL16-R    | AGAGACGACGACGTGCCATCCGATG |                                        |
| OsSPL16seq-F | CAGCTGCTGCTGCTGCTTCAGTGTG | Sanger sequencing primer               |
| OsSPL18-F    | TGGGATCATCAAATCCGAGGAG    | Amplify the <i>OsSPL18</i> target site |
| OsSPL18-R    | CTGTCCATGCTCGGGCAGGCCG    |                                        |
| OsSPL18seq-F | CCTCCATGAGGGCGATCAGATA    | Sanger sequencing primer               |
| OsSPL13-F    | ATTTGACAAGAGTGCATTATGCA   | Amplify the <i>OsSPL13</i> target site |
| OsSPL13-R    | AGCACTGCATATATGTAGCAGCAG  |                                        |
| OsSPL13seq-F | GCTTCATCATCATCTTGTC       | Sanger sequencing primer               |
| SNB-F        | GGTTAGAATCATCCATTCATG     | Amplify the <i>SNB</i> target site     |
| SNB-R        | CCAGCTTTAGTGCCCACTGTTC    |                                        |
| SNBseq-F     | CTGGTAGCACGGTCACGATTCG    | Sanger sequencing primer               |

380

381 **Supplemental Table 8** Primers for off-target site amplification and sequencing.

| Primer name   | Primer sequence 5'-3'   | Purpose                                  |
|---------------|-------------------------|------------------------------------------|
| sgRNA1M1-F    | GGGACCTCGTTCAGCACAACCCC | Amplify the off target site 1 for sgRNA1 |
| sgRNA1M1-R    | GCAGGTCCAGAAGCTTTGTGGTA |                                          |
| sgRNA1M1seq-F | CTCGCCGCCATGTAGTTGCT    | Sanger sequencing primer                 |
| sgRNA1M2-F    | TTGCTCCCTAAACAACCTCCAG  | Amplify the off target site 2 for sgRNA1 |
| sgRNA1M2-R    | CCTGGTGCAGAGAGTACAAATG  |                                          |
| sgRNA1M2seq-F | GTCAACCTGCACAGGGACAG    | Sanger sequencing primer                 |
| sgRNA1M3-F    | TGCAATGCATCTACTCCCTCAG  | Amplify the off target site 3 for sgRNA1 |
| sgRNA1M3-R    | GATCACACTAGCGACAGCGAGC  |                                          |
| sgRNA1M3seq-F | TTGGACGGACGGAATATAAG    | Sanger sequencing primer                 |
| sgRNA1M4-F    | ACGAGAGCTTCCACTGAACGCA  | Amplify the off target site 4 for sgRNA1 |
| sgRNA1M4-R    | AATCTGCCCGTGTGTCAGCAGAG |                                          |
| sgRNA1M4seq-F | CGCCTCGGGATCAGCAGAT     | Sanger sequencing primer                 |
| sgRNA1M5-F    | TGCAGGTGGTCGGCGATCGCG   | Amplify the off target site 5 for sgRNA1 |
| sgRNA1M5-R    | AGCGCGCGCAGCTTGGCCT     |                                          |
| sgRNA1M5seq-F | ACTACTGGAACACGCACCTA    | Sanger sequencing primer                 |
| sgRNA1M6-F    | GATCACAACCTGCTCGTAAGCTA | Amplify the off target site 6 for sgRNA1 |
| sgRNA1M6-R    | ATATGTCTTATCGGACACGAC   |                                          |
| sgRNA1M6seq-F | AGACGCAAGAACGACAAGC     | Sanger sequencing primer                 |
| sgRNA1M7-F    | CCAAACTCTATCTTGAGCCTTC  | Amplify the off target site 7 for sgRNA1 |
| sgRNA1M7-R    | GAGTTCGACGAGGGAGAGAGA   |                                          |
| sgRNA1M7seq-F | CCAAAACCCTAATTCGAATC    | Sanger sequencing primer                 |
| sgRNA1M8-F    | ATATTCATAATCCCCCTAGAA   | Amplify the off target site 8 for sgRNA1 |
| sgRNA1M8-R    | CCCCAACGCTTCGCGAATCGCA  |                                          |
| sgRNA1M8seq-F | GAGGGAATATACAGTGTA      | Sanger sequencing primer                 |
| sgRNA1M9-F    | CAGAGCCTGGACGGTTCTAC    | Amplify the off target site 9 for sgRNA1 |
| sgRNA1M9-R    | ACAGTACAGCAAATCGCACGT   |                                          |
| sgRNA1M9seq-F | GAGTGCCCCGGCGTCGTCTC    | Sanger sequencing primer                 |

---

|               |                          |                                          |
|---------------|--------------------------|------------------------------------------|
| sgRNA6M1-F    | CTCAACTCTTGGGATTGCAGTTGC |                                          |
| sgRNA6M1-R    | CCGATAAGGTTTGTATTACACAGG | Amplify the off target site 1 for sgRNA6 |
| sgRNA6M1seq-F | GTAGCTAATGGTGATTGTATAC   | Sanger sequencing primer                 |
| sgRNA6M2-F    | GGGCATCAGTTTATGTTCTCCTGC |                                          |
| sgRNA6M2-R    | TTCCACTGGAGTAGCCTGTGAC   | Amplify the off target site 2 for sgRNA6 |
| sgRNA6M2seq-F | ATGCAATGAGAGGCATCAAGAG   | Sanger sequencing primer                 |
| sgRNA6M3-F    | CGAGAGAGTACAGCAGCAGCTG   |                                          |
| sgRNA6M3-R    | CTCCGCCGCCTCGAGTTCCGTC   | Amplify the off target site 3 for sgRNA6 |
| sgRNA6M3seq-F | CCGCGCACCATCTCAACCG      | Sanger sequencing primer                 |
| sgRNA9M1-F    | GCAACAAGATGTTCTCCTCCG    |                                          |
| sgRNA9M1-R    | CTGCCGCCGAAGTCTGCTGCTGC  | Amplify the off target site 1 for sgRNA9 |
| sgRNA9M1seq-F | TGACGACGGCGACGACGACG     | Sanger sequencing primer                 |
| sgRNA9M2-F    | ACACCTGCCAAGAGAATGGCA    |                                          |
| sgRNA9M2-R    | CCGATAGCTGATCAGAACGC     | Amplify the off target site 2 for sgRNA9 |
| sgRNA9M2seq-F | GTGACAGCAGGAACCAAGAC     | Sanger sequencing primer                 |
| sgRNA9M3-F    | TTGGCATCAGCAGCAGGCAGCA   |                                          |
| sgRNA9M3-R    | GAACCAGGCTGAGCTGCCGCC    | Amplify the off target site 3 for sgRNA9 |
| sgRNA9M3seq-F | GAAGACGGTAGCTCCTCCT      | Sanger sequencing primer                 |
| sgRNA9M4-F    | TATTATTCGTGCAATGCATCTA   |                                          |
| sgRNA9M4-R    | ATGCGAGCGGTCTAACCGACGA   | Amplify the off target site 4 for sgRNA9 |
| sgRNA9M4seq-F | CATTCTCACTCTCCACTATTTC   | Sanger sequencing primer                 |

---

382

383
